# Supplementary material for: Growth and optical properties of (Y1−xGdx)3Al5O12:Ce single crystal phosphors for high-brightness neutral white LEDs and LDs
Source: Royal Society of Chemistry journal article supplement (doi:10.1039/c6ce00500d), 2016-01-01
Supplement: c6ce00500d1.pdf [file c6ce00500d1.pdf]

## Supporting Information for

# Growth and optical properties of $(Y_{1-x}Gd_x)_3Al_5O_{12}:Ce$ single crystal phosphors for high-brightness neutral white LEDs and LDs

Stelian Arjoca,<sup>\*a,b</sup> Daisuke Inomata,<sup>c</sup> Yoshitaka Matsushita<sup>a</sup> and Kiyoshi Shimamura<sup>a,b</sup>

<sup>a</sup> National Institute for Materials Science, Tsukuba 305-0044, Japan.

<sup>b</sup> Graduate School of Advanced Science and Engineering, Waseda University, Shinjuku, Tokyo 169-8555, Japan.

<sup>c</sup> Tamura Corporation, Sayama, Saitama 350-1328, Japan.

\*E-mail: arjoca.stelian@nims.go.jp

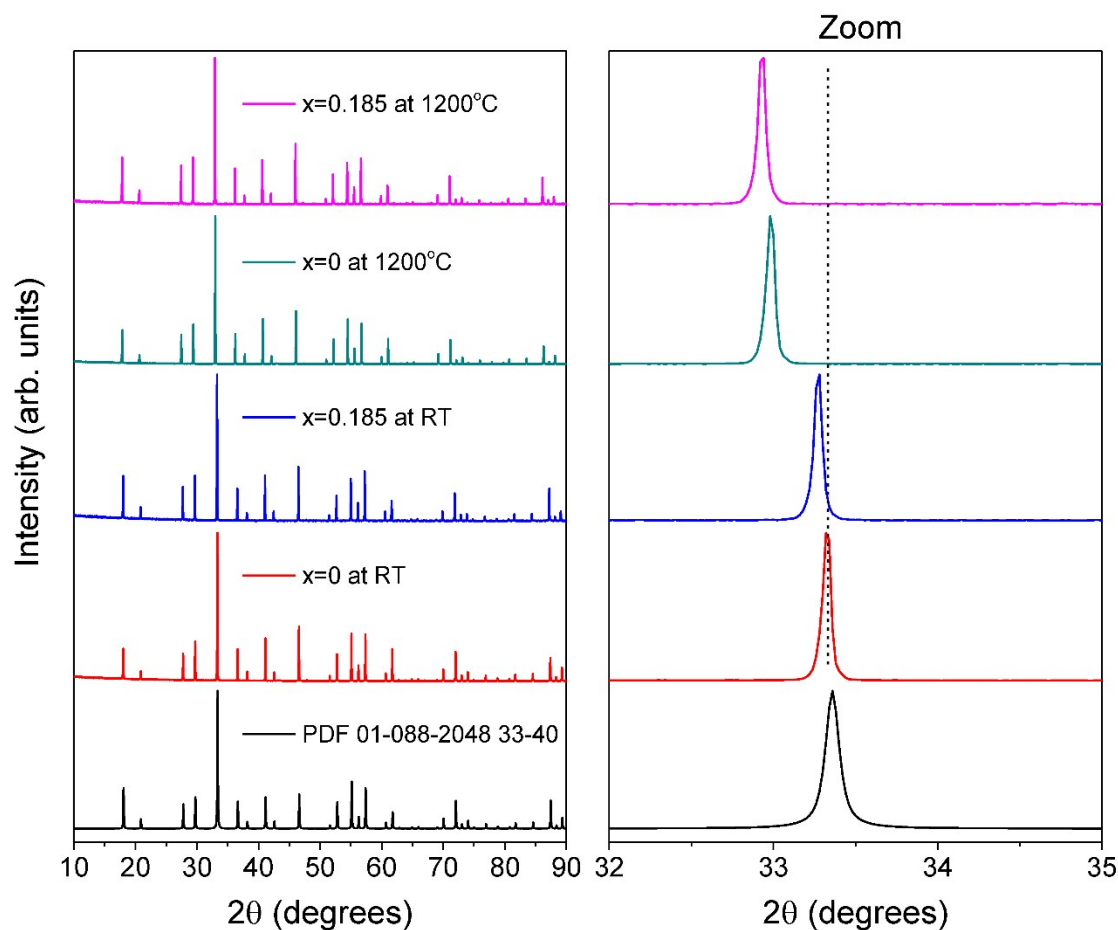

Fig. S1: XRD patterns of  $(Y_{1-x}Gd_x)_3Al_5O_{12}:Ce$  ( $x=0, 0.185$ ) single crystals at room temperature (RT) and 1200°C in comparison with reference YAG pattern. (Right) Zoom around the position of the highest intensity peak.

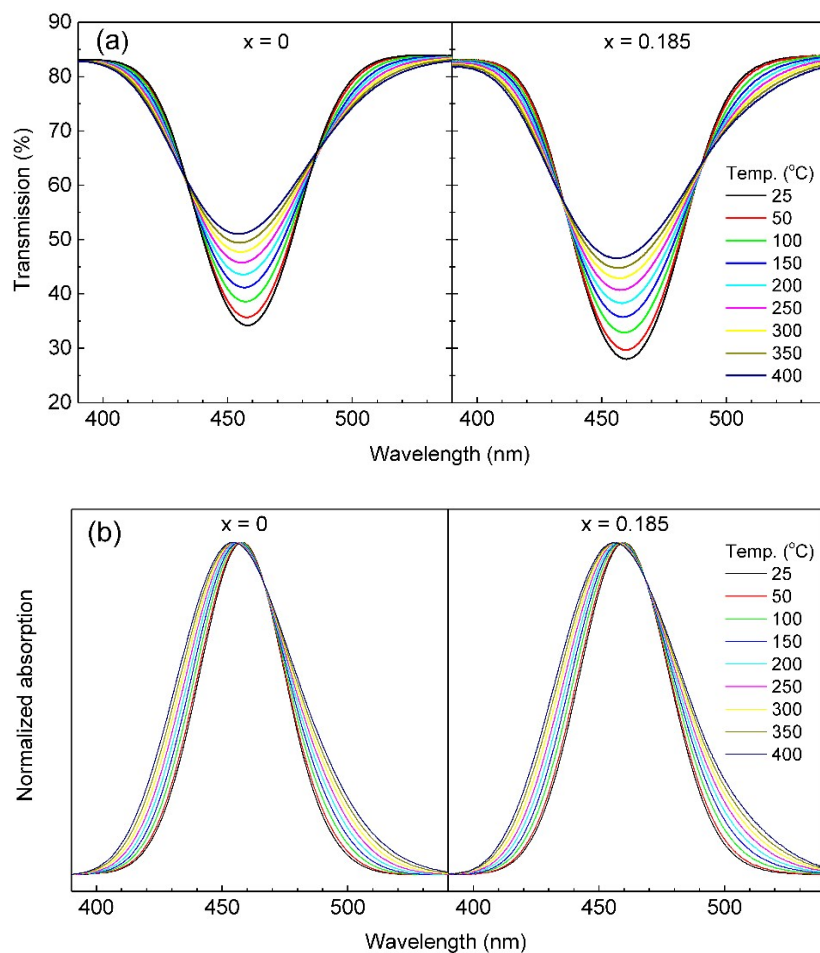

Fig. S2: (a) Transmittance and (b) normalized blue absorption of  $(Y_{1-x}Gd_x)_3Al_5O_{12}:Ce$  ( $x=0, 0.185$ ) single crystals as a function of temperature from 25 to 400°C.

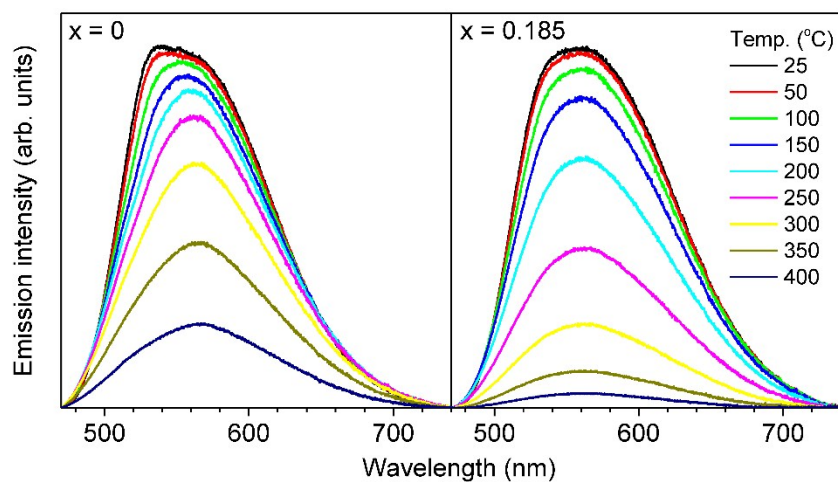

Fig S3: Emission spectra of  $(Y_{1-x}Gd_x)_3Al_5O_{12}:Ce$  ( $x=0, 0.185$ ) single crystals as a function of temperature under constant power 450 nm excitation.

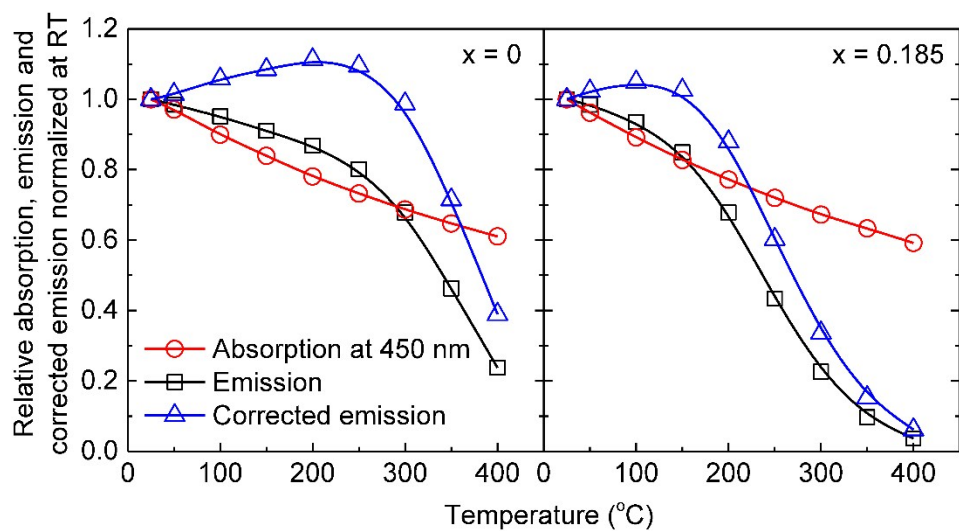

Fig S4: Relative absorption at 450 nm, emission intensity at constant excitation power and corrected emission intensity of  $(Y_{1-x}Gd_x)_3Al_5O_{12}:Ce$  ( $x=0, 0.185$ ) single crystals as a function of temperature.

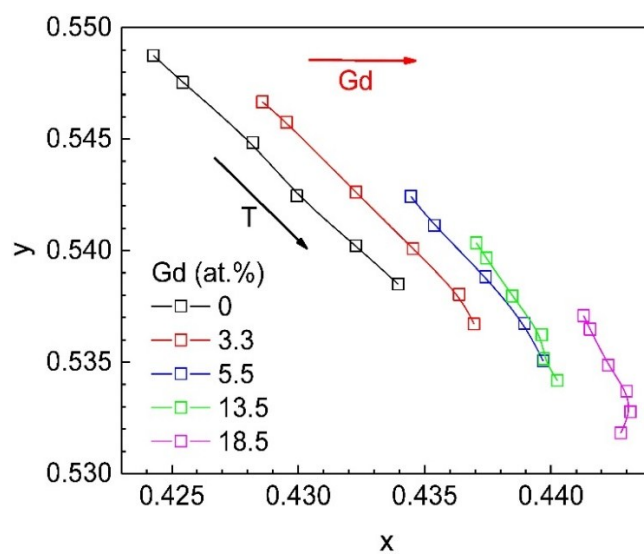

Fig. S5: CIE color coordinates of  $(Y,Gd)_3Al_5O_{12}:Ce$  SCPs as a function of temperature, at room temperature and from 50 to 250°C using with a 50° step.
